# Supplementary material for: To what extents do urbanization and air pollution affect fog?
Source: Copernicus journal article supplement (doi:10.5194/acp-2019-1045), 2020-01-06
Supplement: Supplementary file 1 [file acp-2019-1045-supplement.pdf]

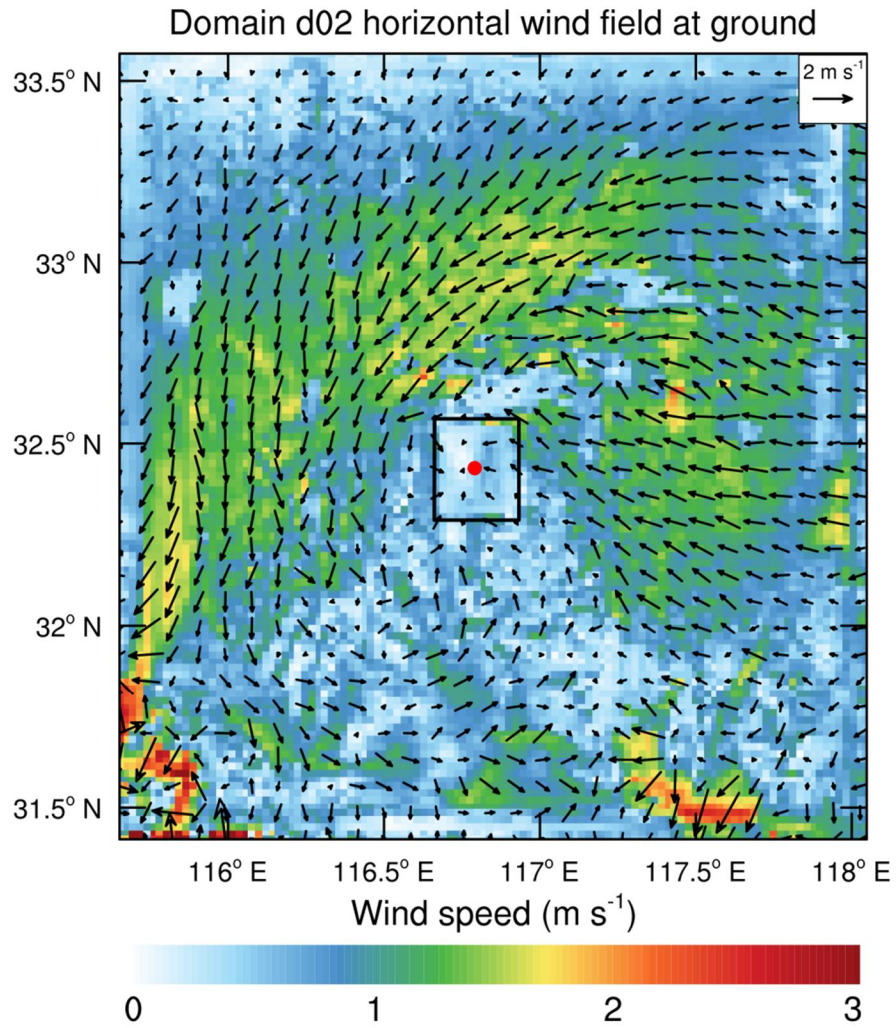

Figure S1. The wind vector (arrows) and wind speed (shaded) in u3e0 at 05:00 03 January. The red dot is SX, and the black box around SX is replaced by urban surface in this experiment. This box shows a wind convergence.

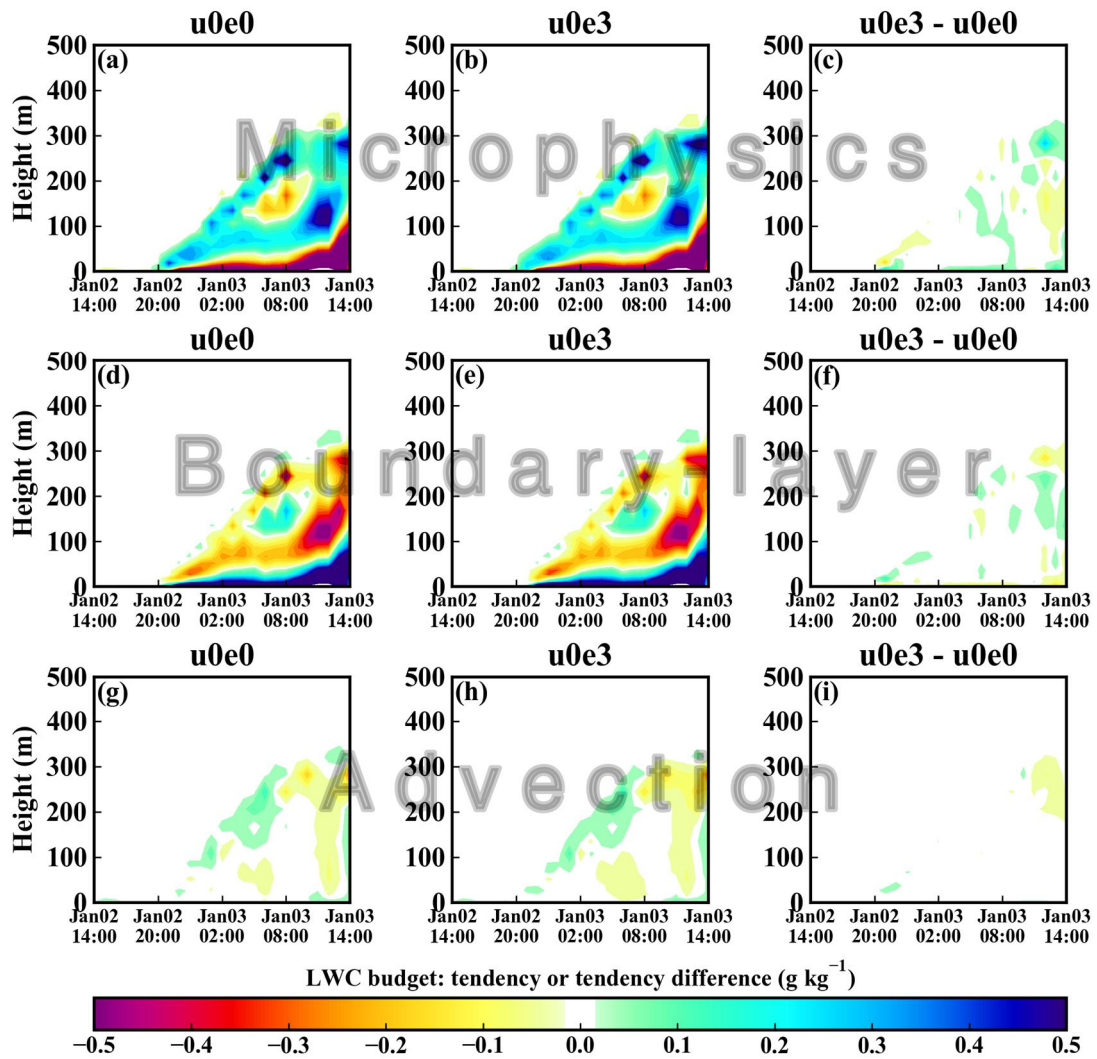

Figure S2. Same as Fig. 10, but for the aerosol effect ( $u0e3$  minus  $u0e0$ ).

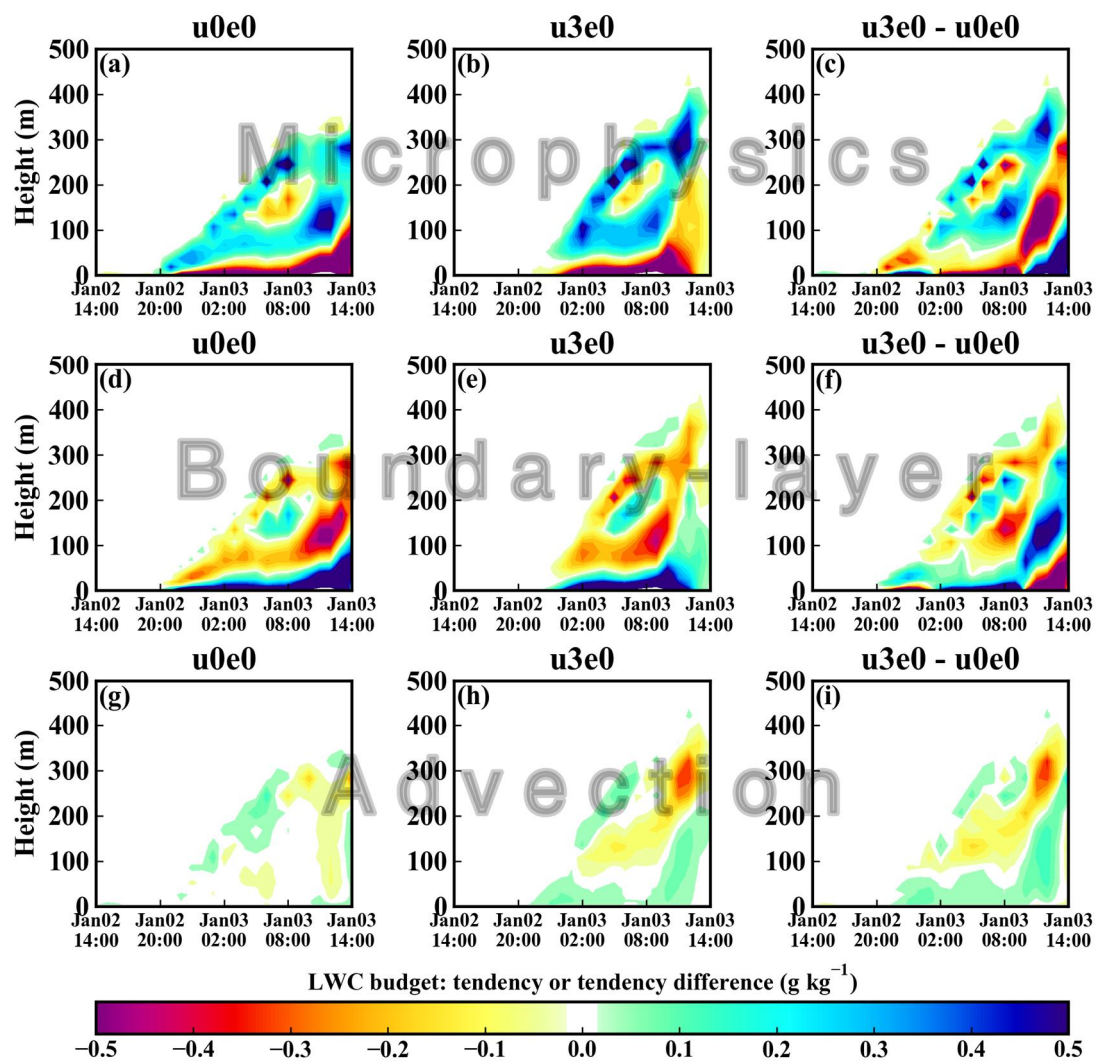

Figure S3. Same as Fig. 10, but for the urbanization effect ( $u3e0$  minus  $u0e0$ ).
